# Supplementary material for: Assessment of patient safety culture among nurses in Djibouti: a multicentric study
Source: Research Square preprint supplement (doi:10.21203/rs.3.rs-6498595/v1), 2025-08-03
Supplement: Supplementary file 1 [file c641e7a5061feef7795b2f4f.pdf]

## SUPPLEMENTARY FILE: QUESTIONNAIRE

**Table S1. Characteristics of Participants.**

| Characteristics                                         | n   | %    |
|---------------------------------------------------------|-----|------|
| <b>Professional Title</b>                               |     |      |
| Nurse                                                   | 239 | 100% |
| <b>Seniority in the Specialty or Current Profession</b> |     |      |
| Less than 1 year                                        | 42  | 18%  |
| 1 to 2 years                                            | 31  | 13%  |
| 3 to 5 years                                            | 36  | 15%  |
| 6 to 10 years                                           | 71  | 30%  |
| 11 years or more                                        | 59  | 25%  |
| <b>Seniority in the Healthcare Facility</b>             |     |      |
| Less than 1 year                                        | 60  | 25%  |
| 1 to 2 years                                            | 40  | 17%  |
| 3 to 5 years                                            | 52  | 22%  |
| 6 years or more                                         | 87  | 36%  |
| <b>Time Spent in Units</b>                              |     |      |
| Less than 50% of your working time                      | 77  | 32%  |
| 50% or more of your working time                        | 162 | 68%  |
| <b>Participation in Management Committees</b>           |     |      |
| YES                                                     | 76  | 32%  |
| NO                                                      | 163 | 68%  |

**Table S2. Perception of Staff Regarding Patient Safety, Quality, and the Number of Reported Adverse Events in the Last 12 Months.**

| <b>Perception of Patient Safety Quality</b> | <b>Overall Percentage</b> | <b>Nurses %</b> |
|---------------------------------------------|---------------------------|-----------------|
| Excellent                                   | 6                         | 3%              |
| Very Good                                   | 11                        | 5%              |
| Acceptable                                  | 88                        | 37%             |
| Poor                                        | 91                        | 38%             |
| Deficient                                   | 43                        | 18%             |
| <b>Number of Reported Events</b>            | <b>Overall Percentage</b> | <b>Nurses %</b> |
| None                                        | 206                       | 87%             |
| 1 to 2 reports                              | 20                        | 8%              |
| 3 to 5 reports                              | 9                         | 4%              |
| 6 to 10 reports                             | 1                         | 0%              |
| 11 to 20 reports                            | 2                         | 1%              |
| More than 20 reports                        | 1                         | 0%              |

**Table S3. Results for All Dimensions and Items of the PSC.**

| <b>Dimensions of Safety Culture Elements in Hospital Units</b>                                                 | <b>Positive Responses</b> | <b>Percentage</b> |
|----------------------------------------------------------------------------------------------------------------|---------------------------|-------------------|
| <b>D1: Overall Perceptions of Safety</b>                                                                       |                           |                   |
| Patient safety is never sacrificed to get more work done                                                       | 76                        | 32%               |
| Our procedures and systems are effective at preventing errors                                                  | 117                       | 49%               |
| It's by chance that there aren't more serious errors here                                                      | 66                        | 28%               |
| We have patient safety issues in this facility                                                                 | 74                        | 31%               |
| <b>D2: Frequency of Reported Events</b>                                                                        |                           |                   |
| When an error is made but detected and corrected before affecting the patient, it is reported                  | 134                       | 29%               |
| When an error is made but is not likely to harm the patient, it is reported                                    | 89                        | 19%               |
| When an error is made that could harm the patient but does not, it is reported                                 | 124                       | 27%               |
| <b>D3: Supervisor or Manager Expectations and Measures to Promote Patient Safety</b>                           | 206                       | 45%               |
| The manager gives positive feedback when they see work done according to established patient safety procedures | 210                       | 45%               |
| The manager takes staff suggestions for improving patient safety seriously                                     | 181                       | 39%               |
| Every time pressure builds up, my manager wants us to work faster, even if it means cutting corners            | 186                       | 40%               |
| My manager neglects recurring patient safety issues                                                            | 248                       | 54%               |
| <b>D4: Organizational Learning and Continuous Improvement</b>                                                  |                           |                   |
| We take active measures to improve patient safety                                                              | 103                       | 43%               |
| Errors have led to positive changes here                                                                       | 83                        | 35%               |
| After making changes to improve patient safety, we evaluate their effectiveness                                | 90                        | 38%               |
| We receive feedback on changes implemented based on event reports                                              | 29                        | 12%               |
| We are informed about errors that occur in the facility                                                        | 95                        | 40%               |
| In this facility, we discuss ways to prevent errors from recurring                                             | 77                        | 32%               |
| <b>D5: Teamwork within Units</b>                                                                               |                           |                   |

|                                                                                        |     |     |
|----------------------------------------------------------------------------------------|-----|-----|
| People help each other in this facility                                                | 99  | 41% |
| When a lot of work needs to be done quickly, we work together as a team to get it done | 134 | 56% |
| In this facility, people treat each other with respect                                 | 141 | 59% |
| When a section of this unit is very busy, others help out                              | 101 | 42% |
| <b>D6: Communication Openness</b>                                                      |     |     |
| Staff will speak up if they see something that could harm patient care                 | 84  | 35% |
| Staff feel free to question decisions or actions of those in authority                 | 38  | 16% |
| Staff are afraid to ask questions when something seems off                             | 101 | 42% |
| <b>D7: Non-punitive Response to Errors</b>                                             |     |     |
| Staff feel that their errors are blamed on them                                        | 82  | 82% |
| When an event is reported, it feels like the person is written up, not the issue       | 58  | 58% |
| We work in "crisis mode" trying to do too much too quickly                             | 50  | 50% |
| <b>D8: Staffing Levels</b>                                                             |     |     |
| We have enough staff to manage the workload                                            | 38  | 16% |
| Staff in this facility work more hours than is ideal for patient care                  | 65  | 27% |
| We work in "crisis mode" trying to do too much too quickly                             | 70  | 29% |
| <b>D9: Management Support for Patient Safety</b>                                       |     |     |
| Management ensures a work environment that promotes patient safety                     | 57  | 24% |
| Management actions show that patient safety is a top priority                          | 94  | 39% |
| Management only seems interested in patient safety after an adverse event occurs       | 86  | 36% |
| Units work well together to provide the best care for patients                         | 94  | 39% |
| <b>D10: Teamwork Between Units</b>                                                     |     |     |
| There is good cooperation between units that need to work together                     | 119 | 50% |
| Units do not coordinate well with each other                                           | 82  | 34% |
| It is often unpleasant to work with staff from other units                             | 92  | 38% |
| Things "slip through the cracks" when transferring patients from one unit to another   | 101 | 42% |

|                                                                             |     |     |
|-----------------------------------------------------------------------------|-----|-----|
| Important information about patient care is often lost during shift changes | 105 | 44% |
| Problems often arise in the exchange of information between units           | 76  | 32% |
